# Supplementary material for: Human gut Actinobacteria boost drug absorption by secreting P-glycoprotein ATPase inhibitors
Source: PubMed Central journal article supplement — iScience. 2024 May 27;27(6):110122. doi: 10.1016/j.isci.2024.110122 (PMC11214321; doi:10.1016/j.isci.2024.110122), 2024-05-27
Supplement: mmc1.pdf [file mmc1.pdf]

**Supplemental information**

**Human gut Actinobacteria boost drug  
absorption by secreting P-glycoprotein  
ATPase inhibitors**

**Than S. Kyaw, Chen Zhang, Moriah Sandy, Kai Trepka, Shenwei Zhang, Luis A. Ramirez Hernandez, Lorenzo Ramirez, Janice J.N. Goh, Kristie Yu, Vincent Dimassa, Elizabeth N. Bess, Jacob G. Brockert, Darren S. Dumlao, Jordan E. Bisanz, and Peter J. Turnbaugh**

## SUPPLEMENTAL INFORMATION

## SUPPLEMENTAL FIGURES AND LEGENDS

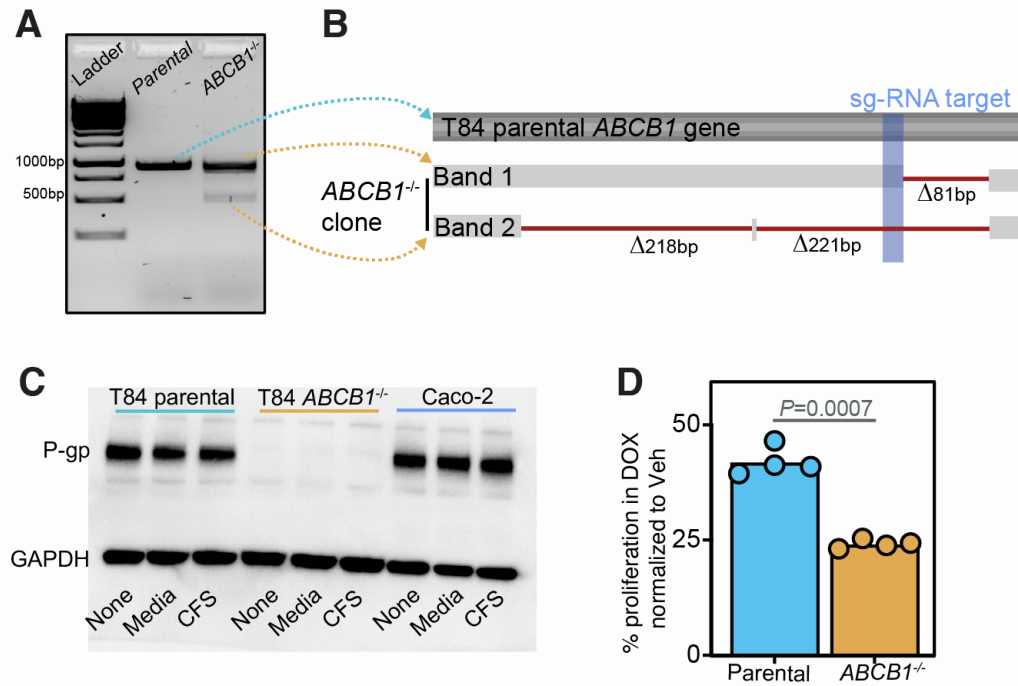

**Figure S1, related to Figure 2. Validation of the  $ABCB1$  knockout monoclonal cell line.** (A) T84 cells were transduced with lentiviral particles carrying cas9 gene and small guide RNA (sg-RNA) against  $ABCB1$  gene. The transfected cells were sorted into a single cell per well and expanded to generate a monoclonal cell line. DNA was extracted and PCR amplified using primers flanking the sg-RNA target site. (B) The two visible bands in the gel were extracted, sequenced, and aligned to the parental T84 PCR product using NCBI multiple alignments tool. (C) Western blot of untreated (none), BHI<sup>+</sup> media, or *E. lenta* CFS treated  $ABCB1^{-/-}$  cell lysates. T84 parental cells and Caco-2 cells were included as controls. (D) P-gp effluxes doxorubicin (DOX) rendering cells with functional P-gp more resistant. Cells without functional P-gp are therefore more sensitive to DOX. Using these principles, P-gp function in  $ABCB1^{-/-}$  cells was tested in a DOX sensitivity assay and growth was normalized to DMSO vehicle (Veh) control (n=4/condition, Wilcoxon test).

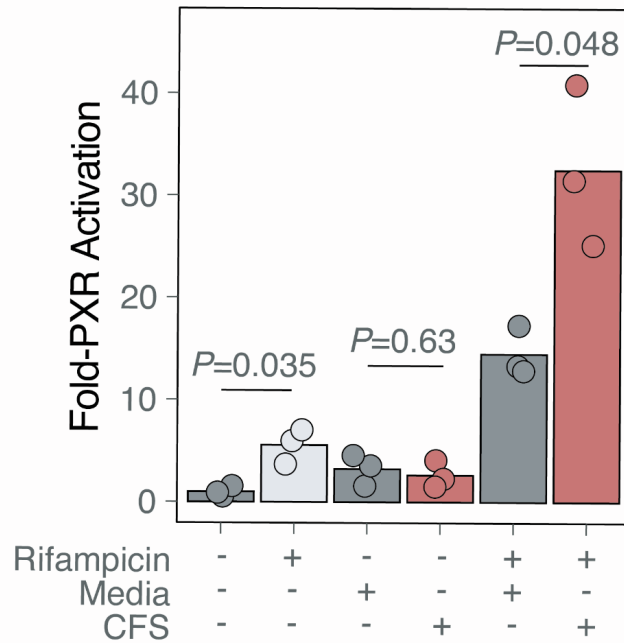

**Figure S2, related to Figure 3. *E. lenta* CFS synergizes with PXR agonists to activate PXR.** To test how P-gp transcription is induced, pregnane X receptor (PXR) luminescence reporter cell line was treated with *E. lenta* CFS cultured in BHI<sup>+</sup>. PXR agonist rifampicin or DMSO vehicle control was added to test for synergistic activity. Luminescence measurements were normalized to the untreated control to calculate the fold change.

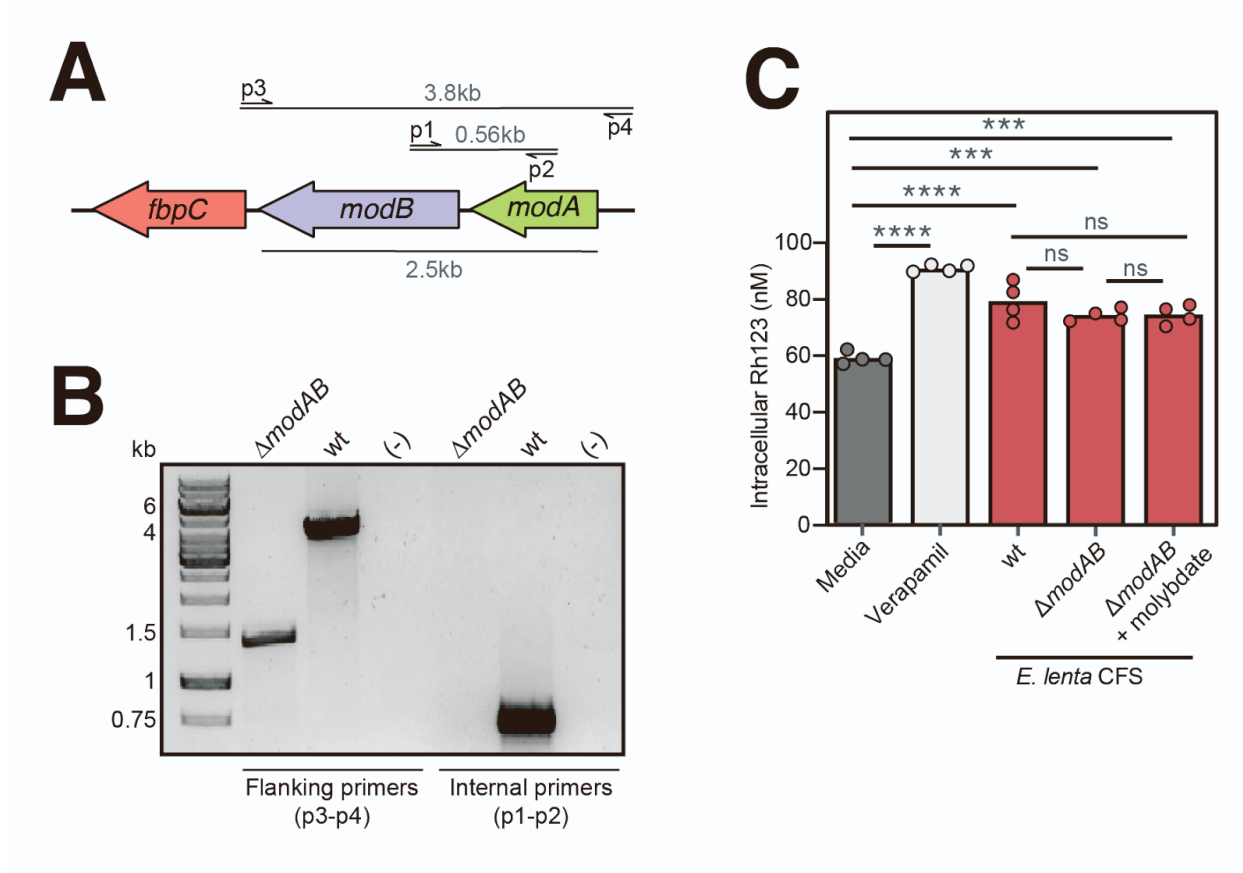

**Figure S3, related to Figure 4. The *modAB* cluster in *E. lenta* is not required for P-gp inhibition.** (A) Scheme of primer design to confirm *modAB* gene deletion in *E. lenta* DSM 2243: flanking primers p3 and p4 yield a 3.80-kb fragment from wildtype (wt) and a 1.38-kb fragment from the  $\Delta$ *modAB* mutant, respectively. Internal primers P1 and P2 anneal only to the *modAB* genes of wt and do not anneal to the  $\Delta$ *modAB* mutant, yielding a 0.56-kb fragment from wt. Primer sequences are listed in **Table S7**. (B) Colony PCR confirmed deletion of *modA* and *modB* genes from *E. lenta* DSM 2243 wt. (C) wt and  $\Delta$ *modAB* strains were cultured in BHI<sup>+</sup> media with and without 2 mg/L ammonium molybdate supplement. CFS was tested for P-gp inhibitory activity in our T84 cell-based assay. Verapamil (10  $\mu$ M) was used as a positive control. n=4/condition and ANOVA with Tukey's correction. \*\*\* $p$ <0.001, \*\*\*\* $p$ <0.0001, ns,  $p$ >0.05.

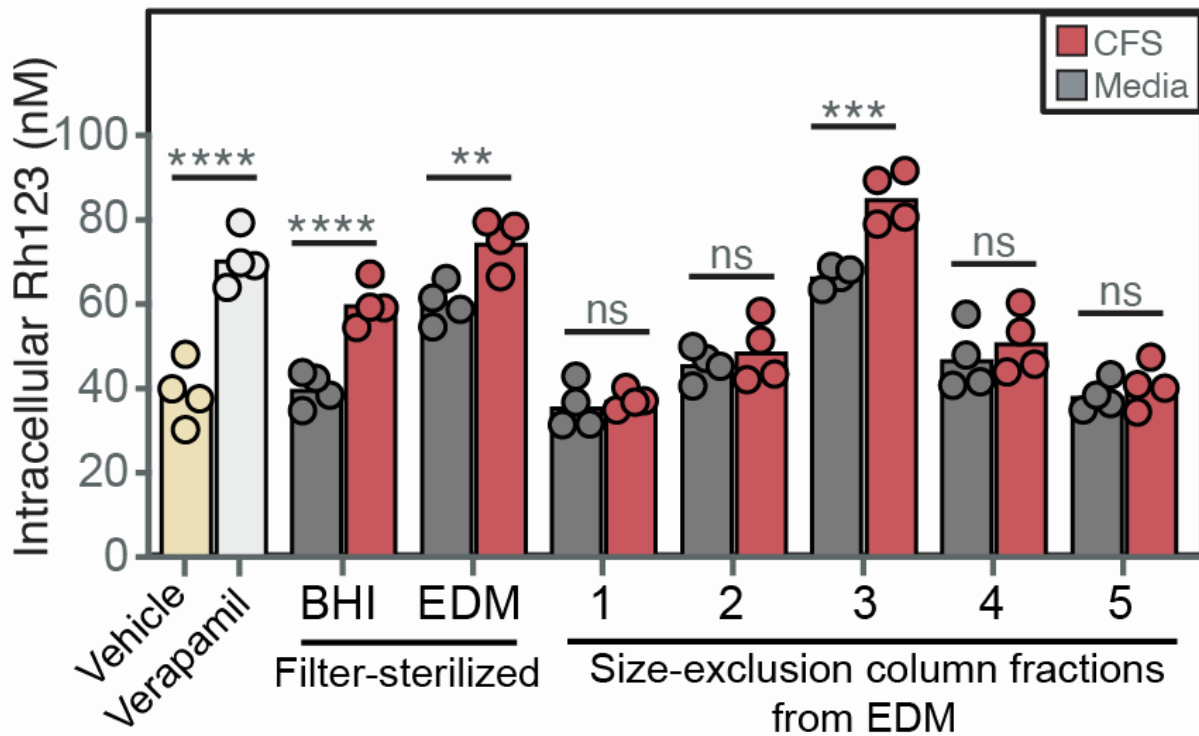

**Figure S4, related to Figure 5. P-gp inhibitory activity is detected in *E. lenta* CFS cultured in EDM.** *E. lenta* DSM2243 CFS from EDM cultures was processed through the activity-guided biochemical fractionation pipeline shown in **Fig. 5A** (n=4/group; two-way ANOVA with Tukey's correction). Vehicle (0.02% DMSO) and 10  $\mu$ M verapamil were included as controls. Filter-sterilized CFS cultured in EDM and BHI<sup>+</sup> were included as controls for fractionations. \*\* $p < 0.01$  \*\*\* $p < 0.001$ , \*\*\*\* $p < 0.0001$ , ns,  $p > 0.05$ .

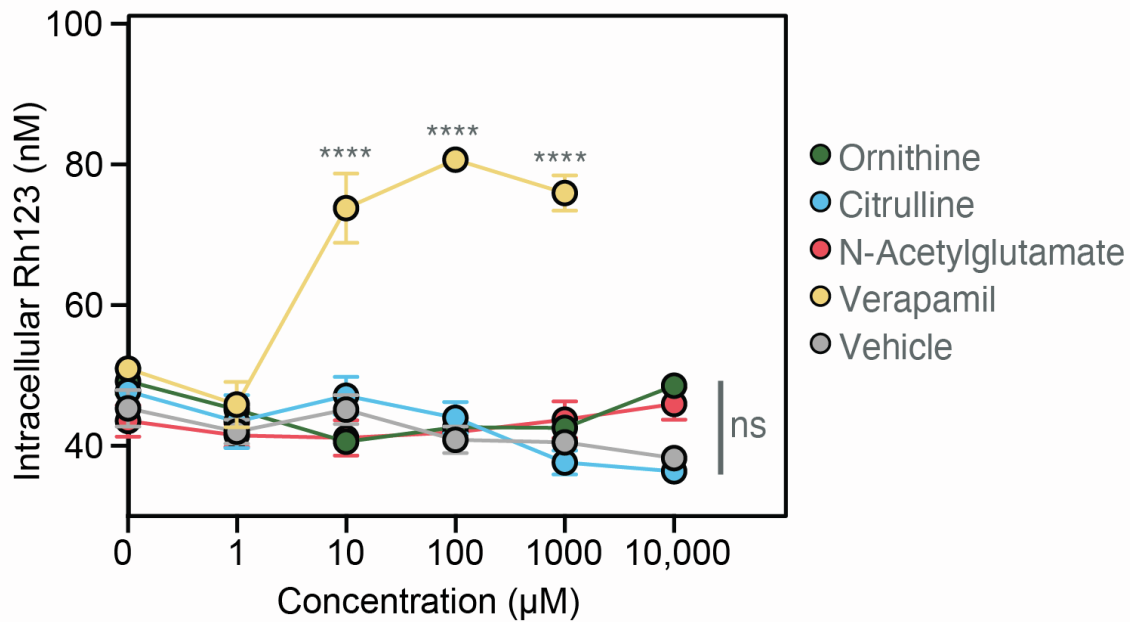

**Figure S5, related to Figure 6. Citrulline, ornithine, and N-acetylglutamate do not inhibit P-gp at high concentrations.** Citrulline and ornithine, byproducts of arginine metabolism in *E. lentae*, and N-acetylglutamate were tested for P-gp inhibitory activity using T84 Rh123 assay at a wide range of concentrations. Verapamil and vehicle were used as positive and negative controls, respectively. We observed cell death for 10mM verapamil incubation. n=4/condition, mean±SEM, ANOVA with Tukey's correction. \*\*\*\* $p < 0.0001$ , ns  $> 0.05$ .

## SUPPLEMENTAL TABLES



**Table S1. Literature review of mechanisms of P-gp inhibition, related to Figure 3.**

| <b>Mechanism</b>                          | <b>Literature evidence (PMID)</b>      |
|-------------------------------------------|----------------------------------------|
| Decreased P-gp expression                 | 23822562, 23621869, 23956061, 23967153 |
| Impaired localization to the cell surface | 23261525, 20460432, 27840996           |
| Increased ATPase activity                 | 9073309, 27531061, 24853187            |
| Decreased ATPase activity                 | 10510451, 28283574                     |
| Increased P-gp degradation                | 27452236, 15322230                     |

**Table S3. Comparative genomics hit annotations and gene expression in *E. lenta* DSM2243, related to Figure 4.**

| Orthologous gene cluster number | Annotation ( <i>E. lenta</i> DSM2243) | Gene ( <i>E. lenta</i> DSM2243) | PSIBLAST Annotation                                 | Mean RPKM ( <i>E. lenta</i> DSM2243) |
|---------------------------------|---------------------------------------|---------------------------------|-----------------------------------------------------|--------------------------------------|
| 264                             | hypothetical protein                  | DSM2243REF_00393                | YerC/YecD family TrpR-related protein               | 227.578649                           |
| 296                             | ATP synthase subunit b                | DSM2243REF_01054                | F0F1 ATP synthase subunit B                         | 1545.93271                           |
| 360                             | hypothetical protein                  | DSM2243REF_02238                | molybdate ABC transporter permease subunit          | 38.7108297                           |
| 362                             | Molybdate-binding protein ModA        | DSM2243REF_02239                | molybdate ABC transporter substrate-binding protein | 142.585188                           |
| 536                             | Iron-dependent repressor IdeR         | DSM2243REF_00584                | metal-dependent transcriptional regulator           | 776.663859                           |
| 556                             | hypothetical protein                  | DSM2243REF_01460                | nucleoid-associated protein                         | 147.534337                           |
| 770                             | hypothetical protein                  | DSM2243REF_02036                | chloride channel protein                            | 82.4496332                           |

**Table S4. Media composition of *E. lenta*-specific defined media (EDM), related to Figure 5.**

| <b>Component</b>                | <b>Amount per L</b> |
|---------------------------------|---------------------|
| Calcium chloride                | 8mg                 |
| Sodium chloride                 | 1.5g                |
| Ferrous sulfate heptahydrate    | 1.5mg               |
| Copper(II) sulfate anhydrous    | 0.088mg             |
| Cobalt(II) chloride hexahydrate | 0.19mg              |
| Ammonium molybdate tetrahydrate | 0.19mg              |
| Boric acid                      | 0.65mg              |
| Zinc(II) sulfate heptahydrate   | 4mg                 |
| Potassium sulfate               | 23mg                |
| Magnesium chloride              | 0.386g              |
| Sodium bicarbonate              | 0.4g                |
| ATCC mineral mix                | 10mL                |
| Potassium phosphate monobasic   | 13.6g               |
| Potassium phosphate dibasic     | 6.48g               |
| Uracil                          | 23mg                |
| Citric acid                     | 1.56g               |
| Hematin                         | 1.72mg              |
| ATCC vitamin mix                | 10mL                |
| Ascorbic acid                   | 0.56g               |
| NAD                             | 2mg                 |
| Pyridoxamine 2HCl               | 5mg                 |
| Menadione                       | 1mg                 |
| Arginine                        | 10g                 |
| Cysteine                        | 0.5g                |
| Histidine                       | 0.15g               |
| L-isoleucine                    | 0.24g               |
| L-leucine                       | 1g                  |
| L-lysine                        | 0.5g                |
| L-methionine                    | 0.125g              |
| L-phenylalanine                 | 0.4g                |
| L-serine                        | 0.5g                |
| L-threonine                     | 0.5g                |
| L-tryptophan                    | 0.2g                |
| L-tyrosine                      | 0.3g                |
| L-valine                        | 0.7g                |
| Proline                         | 0.7g                |
| Potassium acetate               | 0.9g                |
| Water                           | Fill to 1L total    |

**Table S7. List of primers used in this study, related to Figures 1 and 3.**

| Primer target                                                           | Primer name                  | Primer sequence (5' → 3')                                                     |
|-------------------------------------------------------------------------|------------------------------|-------------------------------------------------------------------------------|
| mACTB (NM_007393)                                                       | mACTB_f                      | AGATCAAGATCATTGCTCCTCCT                                                       |
|                                                                         | mACTB_r                      | CAGGTAAGCAAACCTTCTGG                                                          |
| mRpl13A (NM_009438)                                                     | mRpl13A_f                    | CCTATGACAAGAAAAAGCGG                                                          |
|                                                                         | mRpl13A_r                    | CAGGTAAGCAAACCTTCTGG                                                          |
| mB2m (NM_009735)                                                        | mB2m_f                       | GTATGCTATCCAGAAAACCC                                                          |
|                                                                         | mB2m_r                       | CTGAAGGACATATCTGACATC                                                         |
| mAbcb1a (NM_011076)                                                     | mAbcb1a_f                    | ACGTGAGGTCGTGATGGAAC                                                          |
|                                                                         | mAbcb1a_r                    | CTGTCCAGCCAACTGCATA                                                           |
| mCyp3a11 (NM_007818)                                                    | mCyp3a11_f                   | CCTGGGTGCTCCTAGCAATC                                                          |
|                                                                         | mCyp3a11_r                   | TGTGCAATTTCCATAAACCTTGT                                                       |
| hGapdh (NM_002046)                                                      | hGapdh_f                     | GCTCTCTGCTCCTCTGTTC                                                           |
|                                                                         | hGapdh_r                     | GACCAATCCGTTGACTCCG                                                           |
| hACTB (NM_001101)                                                       | hACTB_f                      | ATGATGATATCGCCGCGCTC                                                          |
|                                                                         | hACTB_r                      | CCACCATCACGCCCTGG                                                             |
| hRplp0 (NM_001002)                                                      | hRplp0_f                     | TCCTCGTGGAAGTGACATCG                                                          |
|                                                                         | hRplp0_r                     | TGCTGTCTCCACAATGAAAC                                                          |
| hAbcb1 (NM_000927)                                                      | hAbcb1_f                     | CCATGCTCAGACAGGATGTGA                                                         |
|                                                                         | hAbcb1_r                     | ATCATTGGCGAGCCTGGTAG                                                          |
| <i>E. lenta</i> ( <i>elnmrk1</i> )                                      | elnmrk1_f                    | GTACAACATGCTCCTTGCGG                                                          |
|                                                                         | elnmrk1_r                    | CGAACAGAGGATCGGGATGG                                                          |
|                                                                         | elnmrk1_p                    | [6FAM]TTCTGGCTGCACCGTTCCGGTCCA[BHQ1]                                          |
| modAB upstream repair template                                          | modABUPRT_f                  | aatgacctccctcgtctc                                                            |
|                                                                         | modABUPRT_r                  | ggatcagatcgtccgcagaa                                                          |
| modAB downstream repair template                                        | modABDNRT_f                  | ctcaagtgcgctcgag                                                              |
|                                                                         | modABDNRT_r                  | gcgtaatgggcccgtcat                                                            |
| pLRH3 shuttle plasmid backbone                                          | pLRHbb_f                     | ccctaacgatctaaaacaattcatcc                                                    |
|                                                                         | pLRHbb_r                     | ctgtcagaccaagtttact                                                           |
| bridging oligo for pLRH3 backbone and modAB repair template             | BO_1                         | aatcaatctaaagtatatatagtaaacctggctgacagctcaagtgcgctcgagagccgagaacggctcgtccagc  |
|                                                                         | BO_2                         | gcgctgcgctcgtcgtcaggatgacagggccattacgcaatgaccttccctcgtctcttttcgatggagccgcaacc |
| pLRHmodABKO <sub>s</sub> 1 screening primer                             | pLRHmodABKO <sub>s</sub> 1_f | ctttctacgggctgacg                                                             |
|                                                                         | pLRHmodABKO <sub>s</sub> 1_r | gtatgacattgcctctcgtcgcg                                                       |
| pLRHmodABKO CRISPR array gblock1                                        | gblock1_f1                   | TTCTCGGTCTCCgctgaaacgattcgatcctgtattact                                       |
|                                                                         | gblock1_r1                   | aggccgcaacactcglac                                                            |
|                                                                         | gblock1_r2                   | TTCTCGGTCTCCcgtcaaacagaccagattgctgtt                                          |
| pLRHmodABKO CRISPR array gblock2                                        | gblock2_f                    | TTCTCGGTCTCGtacgaggttgcggcctaac                                               |
|                                                                         | gblock2_r1                   | TTCTCGGTCTCCaccaatcagaggtcgttctg                                              |
|                                                                         | gblock2_r2                   | TTCTCGGTCTCCaccaagagcaactgcttga                                               |
| pLRHmodABKO CRISPR array gblock3                                        | gblock3_f                    | TTCTCGGTCTCGgggtcactccccgatggg                                                |
|                                                                         | gblock3_r                    | TTCTCGGTCTCGaatcaacttgggagagagttcaaa                                          |
| pLRHmodABKO <sub>s</sub> 1 backbone                                     | s1_f                         | tacaggatccgaatglttccctaacgatctaaaacaattcatccagt                               |
|                                                                         | s1_r                         | aactctctccaaagtgtatggatacgatcgtccgagaaag                                      |
| Gibson assembly for CRISPR gBlock and pLRHmodABKO <sub>s</sub> 1 ligati | crisprgblock_f               | tctcggagatcgtatccatcaacttgggagagagttcaaaatg                                   |
|                                                                         | crisprgblock_r               | tgttttagatcgttaaggggaaacgattcgatcctgtattactt                                  |
| pLRHmodABKO screening primer                                            | pLRHmodABKO_f                | gacgctcagtggaaacgaaactcac                                                     |
|                                                                         | pLRHmodABKO_r                | gtatgacattgcctctcgtcgcg                                                       |
| E. lenta DSM 2243 ΔmodAB screening primer, internal                     | ΔmodABi_f                    | taacctgcatagacgccgtt                                                          |
|                                                                         | ΔmodABi_r                    | gacgacacgcacaagaacat                                                          |
| E. lenta DSM 2243 ΔmodAB screening primer, flanking                     | ΔmodABf_f                    | aacaggctgacaggttctg                                                           |
|                                                                         | ΔmodABf_r                    | gacttcgactggccgtc                                                             |
